# Supplementary material
Source: PubMed Central journal article supplement (PMC2956772)
Supplement: NIHMS238853-supplement-01.pdf [file NIHMS238853-supplement-01.pdf]

## Supplementary Material

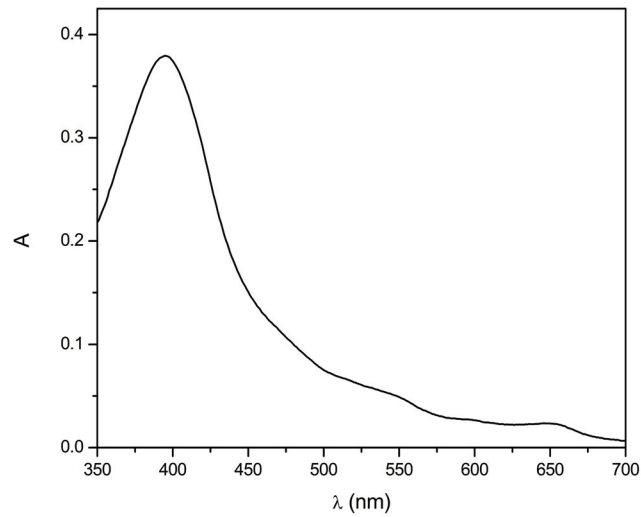

**Fig. S1.** UV-vis spectrum of human iNOS oxyFMN-NCaM construct (14  $\mu$ M). The spectrum has maximum absorbance at 395 nm, typical of high spin penta-coordinated heme protein, and typical flavin (FMN) peaks at 450 and 480 nm and a characteristic high spin ferriheme charge transfer band at 650 nm. Buffer: 40 mM bis-Tris propane, 400 mM NaCl, 10 % glycerol, 2 mM L-Arg, pH 7.6.

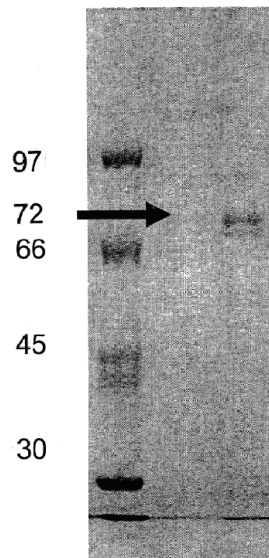

**Fig. S2.** SDS-PAGE of the iNOS oxyFMN-NCaM construct that confirms the size and the purity of the recombinant protein.
